# Supplementary material
Source: Springer Nature journal article supplement (https://www.springermedizin.de/resource/supplementary/12967_2006_132_MOESM10_ESM.pdf/9575770)

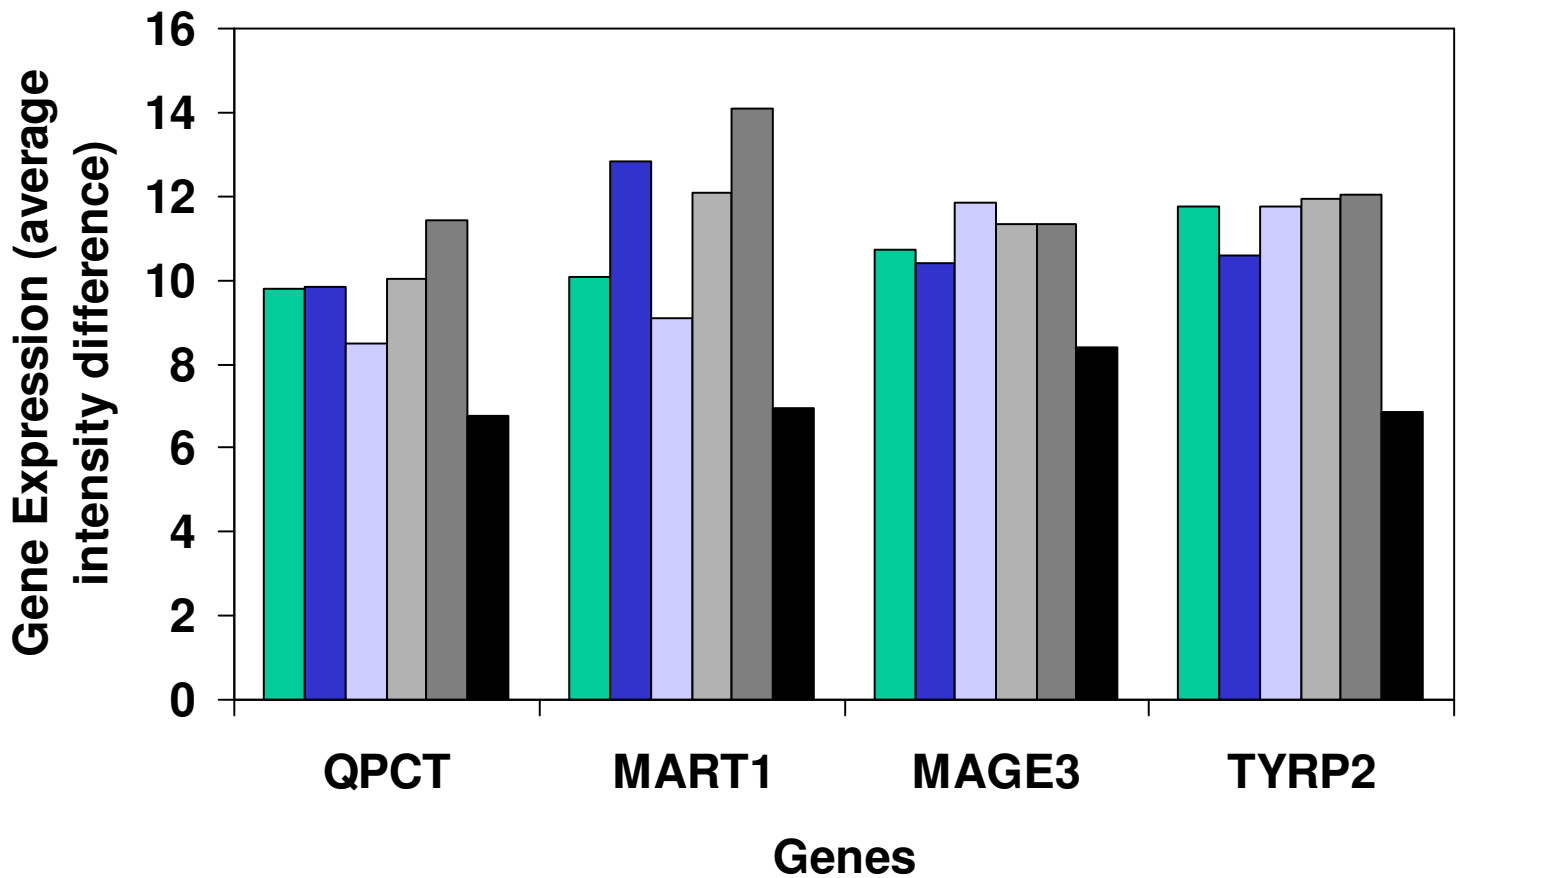

ME43 MEWO A375 SKMEL13 SKMEL19 NonMelanoma

Supplement: MOESM10 [file 9575770]
